## **Factors associated with non-use of ART among men living with HIV in South Africa: findings from a population-based household survey**

Nuha Naqvi<sup>1\*</sup>, Xan Swart<sup>2</sup>, Jeremiah Chikovore<sup>3</sup>, Kassahun Ayalew<sup>1</sup>, Sizulu Moyo<sup>4,5</sup>, Diane Morof<sup>6,7</sup>, David Makapela<sup>1</sup>, Jason Bedford<sup>1</sup>

<sup>1</sup>Centers for Disease Control and Prevention, Pretoria, South Africa

<sup>2</sup>Stellenbosch University, Stellenbosch, South Africa

<sup>3</sup>Human Sciences Research Council, Durban, South Africa

<sup>4</sup>Human Sciences Research Council, Cape Town, South Africa

<sup>5</sup>School of Public Health and Family Medicine, University of Cape Town, South Africa

<sup>6</sup>Centers for Disease Control and Prevention, Durban, South Africa

<sup>7</sup>U.S. Public Health Service Commissioned Corps, Rockville, Maryland, United States

\*Corresponding author: Nuha Naqvi

Email: [qnh2@cdc.gov](mailto:qnh2@cdc.gov)

1 **Abstract**

2 **Introduction:** Although South Africa adopted the World Health Organization's Test and Treat strategy  
3 for HIV epidemic control in 2016, antiretroviral therapy (ART) treatment initiation and retention remain  
4 below target. In 2017, an estimated 56.3% of men living with HIV were on ART. We aimed to investigate  
5 factors associated with non-use of ART among men in South Africa.

6 **Methods:** Utilizing data from the fifth South African National HIV Prevalence, Incidence, Behavior and  
7 Communication (SABSSM V) cross-sectional survey conducted in 2017, a subset of data from HIV-  
8 positive men was stratified based on presence/absence of antiretroviral drugs (ARVs) detected in dried  
9 blood spot samples. Data were weighted to be representative of the national population and analyzed  
10 using multivariable logistic regression to assess predictors of non-use of ART;  $p < 0.05$  was considered  
11 significant.

12 **Results:** A total of 6,920 men aged  $\geq 15$  years old were enrolled in the study, of whom 953 (13.8%) tested  
13 HIV-positive. Among those HIV-positive, 810 (85%) had a known ARV test result: 470 (58%) had ARVs  
14 detected, and 340 (42%) did not have ARVs detected. Non-use of ART in men was associated with high-  
15 risk alcohol use (adjusted odds ratio (AOR)=3.68, 95% confidence interval (CI): 1.03-13.23), being a  
16 widower compared to being unmarried (AOR=6.99, 95%CI: 1.46-33.42), and having drug-resistant HIV  
17 (AOR=28.12, 95%CI: 13.89-56.94). Per year increase in age (AOR=0.67, 95%CI: 0.47-0.96), residence  
18 in rural tribal localities compared to urban localities (AOR=0.38, 95%CI: 0.18-0.78), or having a co-  
19 morbidity such as tuberculosis or diabetes (AOR=0.06, 95%CI: 0.03-0.14) were positively associated  
20 with ART use.

21 **Conclusions:** Non-use of ART was strongly associated with HIV drug resistance. Young men who are  
22 living with HIV, those with high-risk alcohol use, and widowers, should be a priority for HIV  
23 programming and linkage to care. Identifying interventions that are effective at linking these men to ART  
24 will help reduce the burden of HIV in South Africa.

25

## 26 **Introduction**

27 Despite notable gains made in recent years to curb new infections, South Africa continues to battle the  
28 world’s largest HIV epidemic. Although South Africa adopted the World Health Organization’s Test-and-  
29 Treat strategy for HIV epidemic control in 2016 to make antiretroviral therapy (ART) more accessible  
30 and available at no cost in the public sector, treatment initiation and retention remain below target. Poor  
31 retention and non-ART use increases the risk of suboptimal viral suppression, and consequently the  
32 likelihood of further transmission of HIV, drug resistance, treatment failure, associated morbidity and  
33 mortality.

34 The fifth South Africa National HIV Prevalence, Incidence, Behavior and Communication (SABSSM V)  
35 survey, conducted in 2017 found that 56.3% and 65.5% of men and women living with HIV, respectively,  
36 were on ART [1]. The revised Joint United Nations Programme on HIV/AIDS (UNAIDS) Fast-Track 95–  
37 95–95 targets aim to ensure that 95% of people living with HIV (PLHIV) are tested and diagnosed, 95%  
38 of people diagnosed with HIV are receiving treatment, and 95% of people on treatment have a suppressed  
39 viral load. By 2019, estimates indicated that in South Africa, 90% of people were aware of their HIV  
40 status while only 68% of those diagnosed with HIV were on ART [2]. In 2021, ART coverage was  
41 estimated at only 61.9% among males and 72.3% among females aged 15 years and older [3].

42 Across sub-Saharan Africa, men test for HIV at lower rates, have higher rates of attrition from treatment  
43 programs, higher rates of virologic failure on ART, and higher mortality on ART [4]. Men are generally  
44 less likely to engage and remain in care compared to women [5-7], and are more likely to experience a  
45 deterioration in health after an HIV diagnosis [8]. Traditional requirements of men’s employment and  
46 livelihoods tend to contribute to sub-optimal testing and engagement in treatment. A feeling of shame for  
47 appearing “weak” is a well-documented deterrent for men when accessing treatment and healthcare  
48 services [9]. Many men also fear being held responsible for transmitting HIV to their female sexual  
49 partners, experiencing discomfort or embarrassment at being seen in health spaces that are considered

50 feminised spaces, and fear that engaging in care threatens their social standing and ability to socialise or  
51 engage in work [10]. Entrenched gender norms promulgating the view that care-seeking and healthcare  
52 spaces are primarily the woman's domain, contribute to an avoidance of HIV treatment among men. In  
53 addition to stigma related to seeking healthcare, higher rates of alcohol and substance use among men are  
54 also determinants of poor adherence to ART [11-12].

55 It is increasingly clear that strategies to improve access to care and health outcomes among men living  
56 with HIV are essential to reach the UNAIDS 95-95-95 targets by 2030. The objective of this analysis is to  
57 investigate factors associated with non-use of ART among men in South Africa. We describe uptake of  
58 ART uptake among men who tested HIV-positive in the 2017 SABSSM V survey, and explore barriers  
59 associated with effective linkage to HIV care and treatment for men.

60

## 61 **Methods**

62 The data used in this paper were obtained from SABSSM V, a cross-sectional, population-based  
63 household HIV survey conducted in 2017 in South Africa. The multistage stratified random cluster  
64 sampling approach of the survey is fully described elsewhere [1]. In summary, 1,000 small area layers  
65 (SALs) were selected and stratified by province, locality type, and race groups to be nationally  
66 representative. A maximum of 15 households/visiting points were randomly selected from each SAL. All  
67 household members who slept in the selected household the previous night were eligible to participate.  
68 After obtaining consent, household level data were collected through a questionnaire administered to the  
69 head of the household. Thereafter, individual consent was obtained and an individual questionnaire that  
70 collected sociodemographic information, knowledge and attitudes about HIV, and sexual behavior data  
71 was administered. Adults aged 18 years or older signed informed consent forms, while parental/legal  
72 guardian consent and individual assent were obtained for those aged 15-17 years old. The survey

73 questionnaires were captured electronically on a Mercer A105 tablet utilizing Census and Survey  
74 Processing System (CSPPro) software.

75 Dried blood spot (DBS) specimens were collected by finger prick to test for HIV status, viral load (VL),  
76 HIV recency using the limiting-antigen (LAg) avidity enzyme immunoassay (EIA), HIV drug resistance  
77 (HIVDR), and detection of antiretroviral drugs (ARVs) from consenting participants. HIV antibody status  
78 was determined using an algorithm with two different EIAs and a nucleic acid amplification test (NAAT)  
79 for validating all positive results. VL testing used the Abbott platform (Abbott m2000 HIV Real-Time  
80 System, Abbott Molecular Inc., Des Plaines, IL, USA). Samples with VL >1,000 copies/mL were  
81 classified as virally unsuppressed and were submitted for HIVDR testing. HIVDR testing was conducted  
82 by Next Generation Sequencing (NGS). Detection of ARVs in DBS samples was done by high-  
83 performance liquid chromatography (HPCL) coupled with Tandem Mass Spectrometry. The testing panel  
84 focused on drugs used in the public sector programme, and was set to detect Nevirapine, Efavirenz,  
85 Lopinavir, Atazanavir and Darunavir. The detection limit was set at 0.02 µg/mL for each drug, with a  
86 signal-to-noise ratio of at least 5:1.

87 The Human Sciences Research Council Research Ethics Committee provided ethical approval for the  
88 survey (REC 4/18/11/15). This project was reviewed in accordance with Centers for Disease Control and  
89 Prevention (CDC) human research protection procedures and was determined to be research, but CDC  
90 investigators did not interact with study participants or have access to identifiable data or specimens for  
91 research purposes. Personal identifiable information was not collected in the survey and confidentiality  
92 was maintained during data collection, storage, analysis, and reporting.

93 For this analysis, a sub-sample comprised of HIV-positive male participants  $\geq 15$  years of age was  
94 extracted. Female participants, male participants <15 years of age, and those who tested HIV-negative at  
95 the time of the survey were excluded from this analysis. The outcome of interest was ARV use – those in  
96 whom *ARVs were detected* (one or more of the five drugs in the testing panel) and those in whom *ARVs*  
97 *were undetected*, representing males who were currently taking ARVs and males who were not (the latter

98 includes both those that were ART non-adherent and those that had never initiated ART) at the time of  
99 sample collection. Figure 1 shows a flow diagram of study participants included in this analysis.

100 **Figure 1: Study Sample Flow Diagram, SABBSM V survey, 2017**

101

102 ***Variables***

103 In this analysis, ART use is defined based on the detection of any ARVs in blood specimens. Although  
104 ART adherence was verbally volunteered by participants, these data were not used in this analysis due to  
105 possible social desirability bias (being non-adherent is seen as a less desirable trait) and the authors opted  
106 for a more robust observation of ART use.

107 Probing factors associated with ART non-use in South African HIV-positive males followed a multi-  
108 faceted approach. Behavioral and demographic variables with known relationships to ART uptake and  
109 other variables that were significant in the univariate analysis were then built into a logistic regression  
110 model. Multi-level nominal variables with small samples were merged into variable categories for concise  
111 analysis. Employment status, for example, originally consisted of five categories including 1)  
112 unemployed, 2) sick/disabled and unable to work, 3) student/pupil, 4) employed/self-employed, and 5)  
113 other. This was reduced to *employed* or *unemployed* groupings, which aided in generating relatively stable  
114 estimates in the regression analysis. This reduction approach was used for level of education, main source  
115 of healthcare, number of comorbidities, history of drug use, and number of life-time sexual partners.

116 Participants who scored 16 or more on the Alcohol Use Disorders Identification Test (AUDIT) [13] tool  
117 were labelled as high risk for alcohol abuse/addiction in this study.

118 ***Analysis***

119 All statistical analyses were conducted using STATA software version 14.0 (Stata Corporation, College  
120 Station, TX, United States) and RStudio 4.1.2 [14] using the survey package 4.0 [15], with data weighted  
121 to be representative of the national population by sex, age, and race for 2017 as provided by the SABSSM  
122 V survey. Exploratory analysis of factors assessed the variables' respective distributions followed by

123 appropriate hypothesis tests (student's t-test, chi-squared, Wilcoxon Rank-Sum tests) to test for  
124 statistically significant differences between the detected and undetected ARV groups. Missing values  
125 were excluded and  $p < 0.05$  was considered significant.

126 Univariate logistic regression was used to analyze the strength of associations between individual  
127 predictor variables and outcome variables, reported as odds ratios (ORs). A multivariable logistic  
128 regression model including all relevant behavioral and sociodemographic variables was constructed to  
129 measure the net effect of predictor variables on the outcome of ART non-use. Continuous independent  
130 variables were standardized and centered at their respective means. Assessment of model fit parameters  
131 (Akaike Information Criterion (AIC), pseudo- $R^2$ ) and level of missingness in certain factors guided the  
132 construction of a final reduced multivariable logistic regression model, the results of which, are reported  
133 as adjusted odds ratios (AORs) and 95% confidence intervals (CIs).

134

## 135 **Results**

136 A total of 6,920 men aged  $\geq 15$  years were enrolled in the study, of whom 953 (13.8%) had a laboratory  
137 confirmed HIV-positive result. Among those HIV-positive, 810 (85.0%) had a known ARV test result:  
138 470 (58%) had ARVs detected, and 340 (42%) did not have ARVs detected. Table 1 shows the  
139 unweighted frequencies and weighted proportions of sociodemographic, behavioral, and clinical  
140 characteristics of participants by ARV status. The mean age of the total study population was 38 years  
141 old, lower among the ARV-undetected group (mean age of 34 years old) than the ARV-detected group  
142 (mean age of 41 years old). Most participants identified as Black African (93.9%) and resided in urban  
143 areas (67.4%). More than one quarter (29%) graduated from high school/finished matric and  
144 approximately half were unemployed (50.6%). Most participants reported never being married (69.1%); a  
145 greater proportion of those in the ARV-undetected group (74.7%) reported never being married as  
146 compared to the ARV-detected group (64.5%).

147 **Table 1. Sociodemographic and behavioral characteristics of HIV-positive men aged ≥15 years by**  
 148 **ARV status, 2017 SABSSM V survey.**

|                                                   | <b>Overall<br/>(N=810)</b> | <b>ARVs detected<br/>(n=470)</b> | <b>ARVs<br/>undetected<br/>(n=340)</b> |
|---------------------------------------------------|----------------------------|----------------------------------|----------------------------------------|
|                                                   | <i>Mean (SD)</i>           | <i>Mean (SD)</i>                 | <i>Mean (SD)</i>                       |
| <b>Age (years)</b>                                | 38 (11.05)                 | 41 (11.47)                       | 34 (9.25)                              |
|                                                   | <i>N (weighted %)</i>      | <i>n (weighted %)</i>            | <i>n (weighted %)</i>                  |
| <b>Locality type</b>                              |                            |                                  |                                        |
| Urban                                             | 441 (67.4)                 | 243 (63.3)                       | 198 (72.4)                             |
| Tribal Rural                                      | 269 (26.6)                 | 181 (32.1)                       | 88 (19.9)                              |
| Farm Rural                                        | 100 (6.0)                  | 46 (4.6)                         | 54 (7.7)                               |
| <b>Race</b>                                       |                            |                                  |                                        |
| Black African                                     | 654 (93.9)                 | 382 (94.2)                       | 272 (93.5)                             |
| Coloured                                          | 55 (4.4)                   | 26 (3.3)                         | 29 (5.7)                               |
| Indian/White                                      | 30 (1.7)                   | 18 (2.5)                         | 12 (0.8)                               |
| <b>Marital Status</b>                             |                            |                                  |                                        |
| Married                                           | 176 (24.5)                 | 113 (28.0)                       | 63 (20.3)                              |
| Never Married                                     | 542 (69.1)                 | 301 (64.5)                       | 241 (74.7)                             |
| Divorced / separated                              | 25 (3.3)                   | 19 (4.4)                         | 6 (1.9)                                |
| Widower                                           | 28 (3.1)                   | 16 (3.2)                         | 12 (3.1)                               |
| <b>Employment Status = Unemployed</b>             | 426 (50.6)                 | 277 (57.2)                       | 149 (42.6)                             |
| <b>Level of Education Achieved</b>                |                            |                                  |                                        |
| No Education                                      | 65 (6.8)                   | 43 (8.1)                         | 22 (5.3)                               |
| Completed Primary School                          | 182 (19.0)                 | 118 (21.8)                       | 64 (15.7)                              |
| Completed Grade 8-11                              | 330 (44.4)                 | 185 (44.1)                       | 145 (44.8)                             |
| Completed Matric or Higher Education              | 193 (29.7)                 | 102 (26.0)                       | 91 (34.2)                              |
| <b>Perception of own health</b>                   |                            |                                  |                                        |
| Excellent                                         | 166 (21.6)                 | 90 (19.2)                        | 76 (24.6)                              |
| Good                                              | 400 (55.5)                 | 218 (51.1)                       | 182 (61.0)                             |
| Fair                                              | 159 (17.6)                 | 108 (23.1)                       | 51 (10.8)                              |
| Poor                                              | 43 (5.3)                   | 31 (6.6)                         | 12 (3.6)                               |
| <b>Time since last visit to health facility</b>   |                            |                                  |                                        |
| Within the past six months                        | 415 (55.3)                 | 292 (66.1)                       | 123 (42.0)                             |
| More than six months but not more than a year ago | 105 (12.1)                 | 55 (10.4)                        | 50 (14.2)                              |
| More than one year ago                            | 172 (22.8)                 | 69 (15.6)                        | 103 (31.6)                             |
| Never                                             | 75 (9.8)                   | 30 (7.9)                         | 45 (12.3)                              |
| <b>Main source of healthcare</b>                  |                            |                                  |                                        |
| Government                                        | 677 (85.3)                 | 406 (86.7)                       | 271 (83.6)                             |
| Private                                           | 74 (11.4)                  | 37 (11.4)                        | 37 (11.4)                              |
| Other                                             | 15 (3.3)                   | 3 (1.9)                          | 12 (5.1)                               |
| <b>Previous TB diagnosis = No</b>                 | 620 (82.2)                 | 325 (73.0)                       | 295 (93.5)                             |
| Yes                                               | 190 (17.8)                 | 145 (17.0)                       | 45 (6.5)                               |
| <b>Comorbidities</b>                              |                            |                                  |                                        |
| No comorbidities                                  | 495 (64.0)                 | 208 (45.9)                       | 287 (86.4)                             |
| One Comorbidity                                   | 243 (28.2)                 | 201 (41.6)                       | 42 (11.5)                              |
| Two or More Comorbidities                         | 72 (7.8)                   | 61 (12.4)                        | 11 (2.0)                               |
| <b>Presence of a disability: Yes</b>              | 43 (4.5)                   | 32 (6.8)                         | 11 (1.6)                               |
| <b>History of drug use = Yes</b>                  | 146 (22.5)                 | 78 (24.3)                        | 68 (20.1)                              |
| <b>High probability of alcohol abuse = Yes</b>    | 46 (6.8)                   | 23 (5.5)                         | 23 (8.4)                               |
| <b>High risk alcohol use score (mean (SD))</b>    | 3.44 (6.40)                | 2.88 (5.81)                      | 4.22 (7.01)                            |



|                                                                   |            |            |            |
|-------------------------------------------------------------------|------------|------------|------------|
| <b>HIV drug resistance = Yes</b>                                  | 332 (50.5) | 83 (22.6)  | 249 (83.6) |
| <b>Number of lifetime sexual partners</b>                         |            |            |            |
| Zero/one partner                                                  | 81 (13.2)  | 44 (12.9)  | 37 (13.7)  |
| Two-Three Partner                                                 | 116 (15.5) | 66 (14.6)  | 50 (16.7)  |
| More than three partner                                           | 389 (71.3) | 235 (72.5) | 154 (69.6) |
| <b>Previous sexually transmitted infection</b>                    | 49 (9.6)   | 27 (8.2)   | 22 (11.2)  |
| <b>Demonstrated understanding of HIV prevention = Yes</b>         | 467 (62.3) | 279 (61.6) | 188 (63.1) |
| <b>Demonstrated understanding of HIV treatment = Yes</b>          | 571 (79.3) | 359 (87.3) | 212 (69.3) |
| <b>Stigma towards HIV positive individuals = Yes</b>              | 334 (40.2) | 178 (38.9) | 156 (41.7) |
| <b>Has a mental illness or exhibits mental distress = Present</b> | 329 (43.1) | 192 (43.3) | 137 (42.8) |

149 Table 1 includes the unweighted frequencies (N/n) and weighted proportions (%) of sociodemographic, behavioral, and clinical  
150 characteristics of participants by ARV status.

151 Abbreviations: ART – Antiretroviral therapy; SABSSM – South Africa National HIV Prevalence, Incidence, Behavior and  
152 Communication survey; SD – standard deviation; TB – tuberculosis.

153  
154 Table 2 displays the univariate and multivariable logistic regression models of factors associated with  
155 non-use of ART. In observing the univariate model, being employed was found to be a predictor of ART  
156 use compared to those who are unemployed (odds ratio (OR)=0.56, 95%CI: 0.37-0.83, p<0.001). A  
157 demonstrated understanding of HIV treatment was found to be associated with a decreased likelihood of  
158 ART non-use (OR=0.33, 95%CI: 0.19-0.56, p<0.001). Presence of a disability decreased the likelihood of  
159 ART non-use among men compared to the absence of disability (OR=0.22, 95%CI: 0.07-0.68, p=0.010).  
160 Having no history of a tuberculosis (TB) diagnosis significantly increased the odds of not using ART  
161 (OR=5.30, 95%CI: 2.55-11.01, p<0.001). However, these variables were not determined to be significant  
162 in the multivariable models.

163 Adjusting for age (and other known covariates) in the reduced multivariable model, non-use of ART in  
164 men was associated with high risk of alcohol abuse (adjusted odds ratio (AOR)=3.68, 95%CI: 1.03-13.23,  
165 p=0.046), being a widower compared to being unmarried (AOR=6.99, 95%CI: 1.46-33.42, p=0.020), and  
166 having drug-resistant HIV (AOR=28.12, 95%CI: 13.89-56.94, p<0.001). Being in the Indian/white race  
167 group decreased the likelihood of ART non-use (AOR=0.21, 95%CI: 0.06-0.84, p=0.027).

168 The reduced multivariable model showed older age to be a significant predictor of ART use, with an AOR  
169 of 0.67 per year increase over the age of 38 years (AOR=0.67, 95%CI: 0.47-0.96, p=0.030) for non-use of  
170 ART. Residence in rural tribal localities compared to urban localities (AOR=0.38, 95%CI: 0.18-0.78,

171 p=0.010) and having a co-morbidity such as diabetes or cardiac disease (AOR=0.06, 95%CI: 0.03-0.14,  
172 p<0.001) were positively associated with ART use. Similarly, having two or more comorbidities reduced  
173 the adjusted odds of ART non-use by 0.04 (95% CI: 0.01-0.13, p-value <0.001) as compared to having no  
174 comorbidities.

175 Age, number of comorbidities, race, type of locality and HIV drug resistance remained statistically  
176 significant across the univariate, saturated, and reduced logistic regression models. High risk of alcohol  
177 abuse (AUDIT score of 16 or more) became significant in the reduced and saturated models but was not  
178 found in the univariate model. Being a widower gained statistical significance in the reduced model only.

179 The saturated model significantly reduced the cohort's size due to missingness in some key independent  
180 predictors, such as lifetime sexual partners and demonstrated basic understanding of HIV treatment  
181 principles, that were being studied. This resulted in some variables being excluded in the reduced logistic  
182 regression model based on missingness. The reduced model, controlling for a number of predictors  
183 simultaneously, was selected based on AIC, Cragg-Uhler and McFadden pseudo-R<sup>2</sup> model fit parameters.  
184 Previous history of a TB diagnosis, education level obtained, time since previous health visit did not  
185 improve the model fit criteria. The reduced model's AIC was 413.1, McFadden and Cragg-Uhler's  
186 pseudo-R<sup>2</sup> was 0.51 and 0.68 respectively.

**Table 2: Factors associated with ART non-use among men aged ≥15 years, 2017 SABSSM V survey.**

|                                          | <b>Univariate Model</b>              | <b>Saturated Multivariable Model</b> | <b>Reduced Multivariable Model</b>   |
|------------------------------------------|--------------------------------------|--------------------------------------|--------------------------------------|
|                                          | <i>OR (95%CI) p-value</i>            | <i>aOR (95%CI) p-value</i>           | <i>aOR (95%CI) p-value</i>           |
| <b>Age (years)</b>                       | <b>0.51 (0.41-0.62) &lt;0.001</b>    | <b>0.41 (0.24-0.69) &lt;0.001</b>    | <b>0.67 (0.47-0.96) 0.030</b>        |
| <b>Locality type of residence</b>        |                                      |                                      |                                      |
| Urban                                    | <i>1 (reference)</i>                 | <i>1 (reference)</i>                 | <i>1 (reference)</i>                 |
| Tribal Rural                             | <b>0.54 (0.35-0.84) 0.010</b>        | <b>0.26 (0.09-0.72) 0.010</b>        | <b>0.38 (0.18 0.78) 0.010</b>        |
| Farm Rural                               | 1.46 (0.83-2.59) 0.190               | 0.47 (0.07-3.16) 0.440               | 0.83 (0.30-2.30) 0.720               |
| <b>Race</b>                              |                                      |                                      |                                      |
| Black African                            | <i>1 (reference)</i>                 | <i>1 (reference)</i>                 | <i>1 (reference)</i>                 |
| Coloured                                 | 1.74 (0.87-3.48) 0.120               | 0.45 (0.04-4.99) 0.510               | 1.41 (0.41-4.67) 0.610               |
| Indian/White                             | <b>0.33 (0.12-0.91) 0.030</b>        | <b>0.07 (0.005-0.978) 0.049</b>      | <b>0.21 (0.06-0.84) 0.027</b>        |
| <b>Marital Status</b>                    |                                      |                                      |                                      |
| Never Married                            | <i>1 (reference)</i>                 | <i>1 (reference)</i>                 | <i>1 (reference)</i>                 |
| Married                                  | 0.63 (0.38-1.02) 0.060               | 2.94 (0.75-11.48) 0.120              | 2.24 (0.873-5.73)0.090               |
| Divorced / separated                     | 0.38 (0.10-1.46) 0.160               | 3.08 (0.58-16.40) 0.190              | 0.56 (0.14-2.28) 0.423               |
| Widower                                  | 0.84 (0.26-2.70) 0.780               | 11.11 (0.29-424.52) 0.200            | <b>6.99 (1.46-33.42) 0.020</b>       |
| <b>Employment Status = Employed</b>      | <b>0.56 (0.37-0.83) &lt;0.001</b>    | 0.49 (0.18-1.32) 0.160               | 0.78 (0.38-1.62) 0.510               |
| <b>Number of comorbidities</b>           |                                      |                                      |                                      |
| No comorbidities                         | <i>1 (reference)</i>                 | <i>1 (reference)</i>                 | <i>1 (reference)</i>                 |
| One Comorbidity                          | <b>0.15 (0.09-0.25) &lt;0.001</b>    | <b>0.10 (0.03-0.29) &lt;0.001</b>    | <b>0.06 (0.03-0.14) &lt;0.001</b>    |
| Two or More Comorbidities                | <b>0.09 (0.03-0.23) &lt;0.001</b>    | <b>0.13 (0.02-0.73) 0.020</b>        | <b>0.04 (0.01-0.13) &lt;0.001</b>    |
| <b>High probability of Alcohol Abuse</b> |                                      |                                      |                                      |
| High probability of Alcohol abuse        | 1.60 (0.71-1.13) 0.260               | <b>4.43 (1.27 -15.47) 0.020</b>      | <b>3.68 (1.03-13.23) 0.046</b>       |
| <b>HIV drug resistance</b>               |                                      |                                      |                                      |
| Present                                  | <b>17.45 (10.02-30.39) &lt;0.001</b> | <b>30.40 (10.01-92.32) &lt;0.001</b> | <b>28.12 (13.89-56.94) &lt;0.001</b> |
| <b>Presence of a Disability:</b>         |                                      |                                      |                                      |
| Disability present                       | <b>0.22 (0.07-0.68) 0.010</b>        | 0.11 (0.01-1.08) 0.060               | 0.16 (0.02-1.11) 0.064               |
| <b>Level of Education Achieved</b>       |                                      |                                      |                                      |
| No Education                             | <i>1 (reference)</i>                 | <i>1 (reference)</i>                 |                                      |
| Completed Primary School                 | 1.10 (0.46-2.63) 0.830               | 0.71 (0.14-3.70) 0.690               |                                      |

|                                                         |                                    |                          |  |
|---------------------------------------------------------|------------------------------------|--------------------------|--|
| Completed Grade 8-11                                    | 1.55 (0.68-3.52) 0.290             | 0.59 (0.14-2.47) 0.470   |  |
| Completed Matric or Higher Education                    | 2.01 (0.85-4.73) 0.110             | 0.81 (0.15-4.44) 0.810   |  |
| <b>Perception of participant's own health</b>           |                                    |                          |  |
| Excellent                                               | <i>1 (reference)</i>               | <i>1 (reference)</i>     |  |
| Good                                                    | 0.93 (0.56-1.55) 0.790             | 2.81 (0.76-10.43) 0.120  |  |
| Fair                                                    | <b>0.37 (0.19-0.70) &lt;0.001</b>  | 2.61 (0.56-12.26) 0.220  |  |
| Poor                                                    | 0.42 (0.14-1.31) 0.140             | 0.72 (0.04-13.02) 0.820  |  |
| <b>Participant's time since previous health visit</b>   |                                    |                          |  |
| Within the past six months                              | <i>1 (reference)</i>               | <i>1 (reference)</i>     |  |
| More than six months but not more than a year ago       | <b>2.14 (1.18-3.88) 0.010</b>      | 1.52 (0.43-5.36) 0.510   |  |
| More than one year ago                                  | <b>3.18 (1.87-5.39) &lt;0.001</b>  | 0.47 (0.10-2.26) 0.350   |  |
| Never                                                   | <b>2.45 (1.25-4.83) 0.010</b>      | 0.84 (0.17-4.28) 0.840   |  |
| <b>Participant's main source of health care</b>         |                                    |                          |  |
| Government                                              | <i>1 (reference)</i>               | <i>1 (reference)</i>     |  |
| Private                                                 | 1.03 (0.53-2.00) 0.920             | 1.22 (0.08-19.21) 0.890  |  |
| Other                                                   | 2.84 (0.64-12.58) 0.170            | 3.19 (0.06-179.46) 0.570 |  |
| <b>Previous TB diagnosis</b>                            |                                    |                          |  |
| No previous diagnosis                                   | <b>5.30 (2.55-11.01) &lt;0.001</b> | 2.82 (0.53-14.88) 0.220  |  |
| <b>Participant has a history of drug use</b>            |                                    |                          |  |
| Participant admits to using drugs                       | 0.78 (0.46-1.32) 0.360             | 0.93 (0.32-2.72) 0.900   |  |
| <b>Previous sexually transmitted infection</b>          |                                    |                          |  |
| Has had a previous STI                                  | 1.41 (0.63-3.16) 0.400             | 1.25 (0.21-7.36) 0.810   |  |
| <b>Demonstrated understanding of HIV prevention</b>     |                                    |                          |  |
| Has demonstrated a basic understanding                  | 1.07 (0.70-1.63) 0.750             | 0.67 (0.24-1.87) 0.450   |  |
| <b>Demonstrated understanding of HIV treatment</b>      |                                    |                          |  |
| Has demonstrated a basic understanding                  | <b>0.33 (0.19-0.56) &lt;0.001</b>  | 0.47 (0.08-2.78) 0.400   |  |
| <b>Exhibits stigma towards HIV positive individuals</b> |                                    |                          |  |
| Exhibited Stigma towards HIV positive people            | 1.12 (0.75-1.68) 0.570             | 1.27 (0.52-3.10) 0.600   |  |

187 Table 2 includes the univariate and multivariable logistic regression (saturated and reduced) models of factors associated with non-use of ART. Odds ratios, confidence intervals,  
188 and p-values are listed for the univariate model. Adjusted odds ratios, confidence intervals, and p-values are listed for the multivariable models.  
189 Abbreviations: A/OR – adjusted/odds ratio; ART – Antiretroviral therapy; SABSSM – South Africa National HIV Prevalence, Incidence, Behavior and Communication survey;  
190 TB – tuberculosis.

## 191 **Discussion**

192 The UNAIDS 95–95–95 targets aim to ensure that 95% of people diagnosed with HIV are receiving  
193 sustained antiretroviral treatment. However, more than 42% of men living with HIV were not on ART at  
194 the time of data collection for this study. In this analysis ART use was higher among men above 38 years  
195 old, men in tribal rural areas compared to urban areas, and men with at least one previously known  
196 comorbidity. Non-use of ART in men was seen with high-risk alcohol use and was strongly associated  
197 with HIV drug resistance.

198 Men generally delay engaging with healthcare until their health has deteriorated severely [9]. The reasons  
199 for delay are largely related to how men internalize and deploy, within their lives and contexts, concepts  
200 of masculinity. Other reasons include lack of time to seek care (due to prioritizing earning and providing  
201 for families) or opting/feeling compelled to spend resources on basic requirements other than health [16].  
202 However, this analysis found that men living with HIV with comorbidities are more likely to take up  
203 ART than those without known comorbidities. This may be because men with comorbidities are already  
204 familiar with healthcare facilities or have developed rapport with providers by seeking care for other  
205 conditions – which in turn impacts their behavior related to ART initiation and continuation. Co-  
206 morbidities can exacerbate or threaten to exacerbate experience of illness, and thus can serve to compel  
207 earlier engagement with healthcare. Further investigation and qualitative studies are needed to explore  
208 such hypotheses.

209 The positive association of ART use with increasing age aligns with findings regarding behavioral and  
210 biological indicators for HIV where younger age is generally associated with a higher viral load [17],  
211 which is a proxy for poor linkage to and uptake of care. The SABSSM V study also reported higher  
212 undiagnosed HIV but also comparatively lower HIV prevalence in younger age groups of men [1].  
213 Modelling estimates for 2021 show HIV prevalence in men peaking in middle-aged (aged 35-44 years  
214 old), and an epidemiological shift of the burden to older men annually [3].

215 Barriers to accessing health services among young people are well-documented in the literature, and  
216 include prohibitive societal values [18-21], judgmental attitudes of health workers, limited access to  
217 relevant information, transport costs, and unsuitable facility operating hours [22-24]. Comparatively, older  
218 people are likely to have stable or wider social networks including larger and more elaborate family ties,  
219 facilitating financial or moral support to their engagement with healthcare [25]. Younger men are also  
220 more likely to engage in risky socialization activities that include or involve substance use. A qualitative  
221 study found a dominant pattern of decreasing binge and frequent drinking as men reached middle-age  
222 which was precipitated by family-building, reductions in drinking with work colleagues, and health  
223 concerns [25].

224 The present analysis also found a significant association between high-risk alcohol abuse and non-uptake  
225 of ART among other poor health outcomes, which is consistent with existing literature regarding alcohol  
226 and substances use and engagement with healthcare [9,17]. Alcohol and substance use are well  
227 documented as barriers to ART uptake [26], especially among younger men who tend to demonstrate  
228 ‘masculine bravado’, as part of assimilating to social groups or fitting in to society. This goes hand in  
229 hand with demonstrating invulnerability and repudiation of the stigmatized ‘unwell’ image [9,16,27].

230 The current analysis found that men residing in tribal informal areas were more likely to be on ART. A  
231 similar finding is reported from an analysis of the association between ART adherence and mental  
232 distress in South Africa, where PLHIV in rural/traditional localities were more likely to be adherent  
233 compared to those in urban areas [12]. Rural tribal areas had the highest response rate to the survey and  
234 demand for circumcision among adult men, but also the lowest in HIV testing, accurate HIV knowledge,  
235 and self-perceived ability to avoid HIV infection [1]. This makes the picture for rural settings complex  
236 and calls for a more in-depth analysis.

237 The demarcation ‘rural’ in South Africa is considered fluid and may vary across the country, thus its  
238 broad usage alongside ‘urban’ may mask finer patterns [28]. Provinces with large urban areas generally  
239 fare better in health outcomes including maternal mortality ratio, infant mortality rate, TB cure rates, and

240 HIV burden [1] but also tend to have higher migration and mobility. Conversely, poorer health outcomes  
241 in rural areas are attributed to socio-economic indicators that include low education level, poor sanitation  
242 and unavailability of potable water, low household incomes, and food insecurity [27]. People in rural  
243 areas generally depend on public healthcare facilities, which typically are distant, and have limited staff,  
244 equipment, and packages of care [29]. Higher ART use in this analysis could be explained by the fact that  
245 informal tribal settings typically contain networks with more intimate connections and ties of community  
246 kinship, which may improve the rapport between patients and healthcare providers where more personal  
247 relationships have been established [30].

248 The finding that Indian and White populations were more likely to be on ART is consistent with HIV  
249 rates reported for these racial groups compared to Black Africans and Coloreds [1]. Race groups in South  
250 Africa tend to use different health sectors [31], and challenges with public healthcare services can be  
251 traceable to the segregationist policies of *apartheid* [32]. Since the end of *apartheid*, more doctors shifted  
252 to the private sector which limits access and affordability of care. Considering that various socio-  
253 economic advantages and vulnerabilities are conferred by race, these contextual and structural challenges  
254 affect ART utilization.

255 Aspects of social organization, including relative absence of anonymity, have significance where studies  
256 have illuminated concerns that providers routinely disclose health details of clients publicly in the  
257 community [33]. Not only do such actions restate the power imbalance between providers/healthcare  
258 systems and patients [34-35]; they also potentially drive HIV stigma. Studies from Southern Africa, for  
259 instance, report on patients not initiating HIV treatment due to the stigma of being witnessed using local  
260 clinics [36], or men being conscious of being labelled for using primary care facilities, which are held to  
261 be feminine spaces [37]. Substantial investment in the public HIV programs in South Africa could be  
262 instrumental in how the public healthcare system manages HIV care more efficiently. Increasing access to  
263 multi-month dispensing (MMD) of ART and using differentiated models of HIV care (DMOC) can

264 minimize congestion in ART facilities and provide tailored ART care to support treatment continuity in  
265 men while reducing stigma and barriers to care [38].

266 Of great concern, this analysis found unacceptably high levels of drug resistance in men with ART non-  
267 use which may indicate ongoing transmission of drug resistant strains. As previously published, the  
268 SABSSM V survey found HIVDR mutations in 29.4% of males aged 15-49 years [39]. Resistance was  
269 detected in 27.4% of samples sequenced from virally unsuppressed respondents, and was most prevalent  
270 in samples from respondents with prior exposure to ART but no ARVs detected at the time of the survey  
271 [39]. Detecting this level of drug resistance is critical to ensuring that the ART regimens in use are  
272 optimal for the population. Dolutegravir-based regimens were not in use at the time of the SABSSM V  
273 survey, and these findings reinforce how critical the Tenofovir, Lamivudine, and Dolutegravir (TLD)  
274 transition continues to be. This underscores the importance of ART optimization and ensuring treatment  
275 adherence is strengthened among PLHIV. Men who have not initiated or have discontinued ART could be  
276 considered a priority population for initiation (or re-initiation) of optimized ART regimens to ensure that  
277 further resistance does not develop or spread, and a higher proportion of PLHIV are able to achieve viral  
278 suppression.

279 Given that Dolutegravir-based regimens (with a higher genetic barrier to resistance than non-nucleoside  
280 reverse transcriptase inhibitor (NNRTI)-based regimens) are now more widely used, findings from  
281 SABSSM VI and other population studies will be informative in terms of better understanding the  
282 prevalence of integrase inhibitor (INSTI) drug resistant mutations among ART patients who are virally  
283 unsuppressed.

#### 284 ***Limitations***

285 Neither ART adherence nor the length of time an individual has been on ARVs were considered in this  
286 analysis. ART adherence was self-reported by participants, but these data were not used in this analysis  
287 due to possible social desirability bias. ART use was determined by ARVs detected in the blood specimen



288 collected at the time of the survey, and detection is affected by the half-life of the medication of interest,  
289 where adherence is suboptimal. The number of participants included in the *ARV undetected* cohort who  
290 may have been unaware of their HIV status was not taken into account for this analysis. Some variables  
291 had to be discarded in the multivariable models due to the large reduction in the dataset's size due to  
292 missingness, despite the univariate analysis finding of significant associations with the outcome variable.

293

## 294 **Conclusions**

295 Trends of gender disparities in HIV program participation in the southern African region require further  
296 study. Analyzing comparable survey data across the region allows for an evaluation of possible obstacles  
297 that discourage men from participating in HIV programming and retention of care. Further insights are  
298 needed as to which factors are at play that encourage or act as barriers to treatment for men, but not for  
299 women.

300 Similar to antenatal and prevention of mother-to-child transmission (PMTCT) programs which have  
301 helped in initiating women on ART, there should be greater social investment in initiatives that solely  
302 target men. Identifying and adapting such interventions that can be effective at linking men to ART and  
303 improve knowledge about HIV treatment, will help reduce the national burden of disease and enable  
304 South Africa, a country with disproportional burden of infection, to finally reach epidemiological control.

305

## 306 **Acknowledgement**

307 The authors would like give thanks and acknowledgement to the entire SABSSM V field staff team, the  
308 field supervisors, the nurses, and the data collectors who worked tirelessly to conduct this survey.

309

## 310 **Funding**

311 This project was supported by the President's Emergency Plan for AIDS Relief (PEPFAR) through the  
312 Centers for Disease Control and Prevention (CDC) under the terms of cooperative agreement  
313 NU2GGH001629. This publication was supported by cooperative agreement NU2GGH002093 from the  
314 Centers for Disease Control and Prevention and the Public Health Institute.

315

### 316 **Disclaimer**

317 The findings and conclusions in this manuscript are those of the authors and do not necessarily represent  
318 the official position of the funding agencies.

## References

1. Simbayi LC, Zuma K, Zungu N, Moyo S, Marinda E, Jooste S, Mabaso M, Ramlagan S, North A, Van Zyl J, Mohlabane N. South African National HIV prevalence, incidence, behaviour and communication survey, 2017: Towards achieving the UNAIDS 90-90-90 targets. Cape Town: HSRC Press; 2019.
2. UNAIDS (2020). Country factsheets, South Africa.
3. Johnson L & Dorrington R. Thembisa version 4.4: A model for evaluating the impact of HIV/AIDS in South Africa. Cape Town: University of Cape Town; 2021. In
4. Brown LB, Getahun M, Ayieko J, Kwarisiima D, Owaraganise A, Atukunda M, Olilo W, Clark T, Bukusi EA, Cohen CR, Kanya MR. Factors predictive of successful retention in care among HIV-infected men in a universal test-and-treat setting in Uganda and Kenya: A mixed methods analysis. *PloS one*. 2019 Jan 23;14(1):e0210126. <https://doi.org/10.1371/journal.pone.0210126>
5. Adeyeye AO, Stirratt MJ, Burns DN. Engaging men in HIV treatment and prevention. *Lancet* (London, England). 2018 Dec 1;392(10162):2334-5. [https://doi:10.1016/S0140-6736\(18\)32994-5](https://doi:10.1016/S0140-6736(18)32994-5)
6. Mukumbang FC. Leaving no man behind: how differentiated service delivery models increase men's engagement in HIV care. *International Journal of Health Policy and Management*. 2021 Mar;10(3):129. <https://doi:10.34172/ijhpm.2020.32>
7. Staveteig S, Croft TN, Kampa KT, Head SK. Reaching the 'first 90': Gaps in coverage of HIV testing among people living with HIV in 16 African countries. *PloS one*. 2017 Oct 12;12(10):e0186316. <https://doi:10.1371/journal.pone.0186316>
8. Lessells RJ, Mutevedzi PC, Cooke GS, Newell ML. Retention in HIV care for individuals not yet eligible for antiretroviral therapy: rural KwaZulu-Natal, South Africa. *JAIDS Journal of Acquired*

- Immune Deficiency Syndromes. 2011 Mar 1;56(3):e79-86.  
<https://doi.org/10.1097/QAI.0b013e3182075ae2>
9. Chikovore J, Hart G, Kumwenda M, Chipungu GA, Desmond N, Corbett L. Control, struggle, and emergent masculinities: a qualitative study of men's care-seeking determinants for chronic cough and tuberculosis symptoms in Blantyre, Malawi. *BMC public health*. 2014 Dec;14(1):1-2.  
<https://doi.org/10.1186/1471-2458-14-1053>
  10. Nardell MF, Adeoti O, Peters C, Kakuhikire B, Govathson-Mandimika C, Long L, Pascoe S, Tsai AC, Katz IT. Men missing from the HIV care continuum in sub-Saharan Africa: a meta-analysis and meta-synthesis. *Journal of the International AIDS Society*. 2022 Mar;25(3):e25889.  
<https://doi.org/10.1002/jia2.25889>
  11. Sileo KM, Simbayi LC, Abrams A, Cloete A, Kiene SM. The role of alcohol use in antiretroviral adherence among individuals living with HIV in South Africa: event-level findings from a daily diary study. *Drug and alcohol dependence*. 2016 Oct 1;167:103-11.  
<https://doi.org/10.1016/j.drugalcdep.2016.07.028>
  12. Marinda E, Zungu N, Chikovore J, Mthembu J, Magampa M, Mathentamo Q, Nwosu CO, Maoba P, Ramlagan S, Zuma K, Moyo S. Association between ART adherence and mental health: results from a national HIV sero-behavioural survey in South Africa. *AIDS and Behavior*. 2021 Oct 23:1-3. <https://doi.org/10.1007/s10461-021-03505-4>
  13. Babor TF, Higgins-Biddle JC, Saunders JB, Monteiro MG. AUDIT: The alcohol use disorders identification test: Guidelines for use in primary health care. World Health Organization; 2001.
  14. Team, R. C. (2021). R: A Language and Environment for Statistical Computing. *R 4.1.2*. Vienna, Austria: R Foundation for Statistical Computing. Retrieved from <https://www.R-project.org/>
  15. Lumley, T. (2020). "survey: analysis of complex survey samples". *R package version 4.0*.
  16. Chikovore J, Hart G, Kumwenda M, Chipungu GA, Corbett L. 'For a mere cough, men must just chew Conjex, gain strength, and continue working': the provider construction and tuberculosis care-seeking implications in Blantyre, Malawi. *Global health action*. 2015 Dec 1;8(1):26292.  
<https://doi.org/10.3402/gha.v8.26292>
  17. Amirhanian YA, Kelly JA, DiFranceisco WJ, Kuznetsova AV, Tarima SS, Yakovlev AA, Musatov VB. Predictors of HIV care engagement, antiretroviral medication adherence, and viral suppression among people living with HIV infection in St. Petersburg, Russia. *AIDS and Behavior*. 2018 Mar;22:791-9. <https://doi.org/10.1007/s10461-016-1638-9>
  18. Chikovore J, Nystrom L, Lindmark G, Ahlberg BM. Denial and violence: Paradoxes in men's perspectives to premarital sex and pregnancy in Rural Zimbabwe. *African Sociological Review/Revue Africaine de Sociologie*. 2003;7(1):53-72.
  19. Chikovore J, Nystrom L, Lindmark G, Ahlberg BM. HIV/AIDS and sexuality: concerns of youths in rural Zimbabwe. *African Journal of AIDS Research*. 2009 Dec 1;8(4):503-13.  
<https://doi.org/10.2989/AJAR.2009.8.4.14.1051>
  20. Chikovore J, Nystrom L, Lindmark G, Ahlberg BM. "How can I gain skills if I Don't practice?" the dynamics of prohibitive silence against pre-marital pregnancy and sex in Zimbabwe. *PloS one*. 2013 Jan 23;8(1):e53058. <https://doi.org/10.1371/journal.pone.0053058>

21. Waling A, Farrugia A, Fraser S. Embarrassment, shame, and reassurance: Emotion and young people's access to online sexual health information. *Sexuality Research and Social Policy*. 2022 Jan 10:1-3. <https://doi.org/10.1007/s13178-021-00668-6>
22. Mokomane Z, Mokhele T, Mathews C, Makoae M. Availability and accessibility of public health services for adolescents and young people in South Africa. *Children and Youth Services Review*. 2017 Mar 1;74:125-32. <https://doi.org/10.1016/j.childyouth.2017.02.001>
23. Ngwenya N, Nkosi B, Mchunu LS, Ferguson J, Seeley J, Doyle AM. Behavioural and socio-ecological factors that influence access and utilisation of health services by young people living in rural KwaZulu-Natal, South Africa: Implications for intervention. *PloS one*. 2020 Apr 14;15(4):e0231080. <https://doi.org/10.1371/journal.pone.0231080>
24. Nkosi B, Seeley J, Ngwenya N, Mchunu SL, Gumede D, Ferguson J, Doyle AM. Exploring adolescents and young people's candidacy for utilising health services in a rural district, South Africa. *BMC health services research*. 2019 Dec;19(1):1-2. <https://doi.org/10.1186/s12913-019-3960-1>
25. Keenan K, Saburova L, Bobrova N, Elbourne D, Ashwin S, Leon DA. Social factors influencing Russian male alcohol use over the life course: a qualitative study investigating age based social norms, masculinity, and workplace context. *PloS one*. 2015 Nov 17;10(11):e0142993. <https://doi.org/10.1371/journal.pone.0142993>
26. Puryear SB, Balzer LB, Ayieko J, Kwarisiima D, Hahn JA, Charlebois ED, Clark TD, Cohen CR, Bukusi EA, Kanya MR. (2020). Associations between alcohol use and HIV care cascade outcomes among adults undergoing population-based HIV testing in East Africa. *AIDS (London, England)*. 2020 Mar 3;34(3):405. <https://doi.org/10.1097%2FQAD.0000000000002427>
27. Thurnell-Read T. Masculinity, age and rapport in qualitative research. In *Gender identity and research relationships* 2016 May 10 (Vol. 14, pp. 23-41). Emerald Group Publishing Limited.
28. Gaede B, Versteeg M. The state of the right to health in rural South Africa. *South African health review*. 2011 Jan 1;2011(1):99-106. <https://doi.org/10.10520/EJC119080>
29. Harris B, Goudge J, Ataguba JE, McIntyre D, Nxumalo N, Jikwana S, Chersich M. Inequities in access to health care in South Africa. *Journal of public health policy*. 2011 Jun 1;32:S102-23.
30. Rockenbauch T, Sakdapolrak P. Social networks and the resilience of rural communities in the Global South: a critical review and conceptual reflections. *Ecology and Society*. 2017 Mar 1;22(1).
31. Mhlanga D, Garidzirai R. The influence of racial differences in the demand for healthcare in South Africa: A case of public healthcare. *International journal of environmental research and public health*. 2020 Jul;17(14):5043. <https://doi.org/10.3390/ijerph17145043>
32. Bell GJ, Ncayiyana J, Sholomon A, Goel V, Zuma K, Emch M. Race, place, and HIV: The legacies of apartheid and racist policy in South Africa. *Social Science & Medicine*. 2022 Mar 1;296:114755. <https://doi.org/10.1016/j.socscimed.2022.114755>

33. Kumwenda M, Desmond N, Hart G, Choko A, Chipungu GA, Nyirenda D, Shand T, Corbett EL, Chikovore J. Treatment-seeking for tuberculosis-suggestive symptoms: a reflection on the role of human agency in the context of universal health coverage in Malawi. *PloS one*. 2016 Apr 21;11(4):e0154103. <https://doi.org/10.1371/journal.pone.0154103>
34. Nimmon L, Stenfors-Hayes T. The “Handling” of power in the physician-patient encounter: perceptions from experienced physicians. *BMC medical education*. 2016 Dec;16:1-9. <https://doi.org/10.1186/s12909-016-0634-0>
35. Goodyear-Smith F, Buetow S. Power issues in the doctor-patient relationship. *Health care analysis*. 2001 Dec;9:449-62. <https://doi.org/10.1023/A:1013812802937>
36. Chimoyi L, Chikovore J, Musenge E, Mabuto T, Chetty-Makkan CM, Munyai R, Nchachi T, Charalambous S, Setswe G. Understanding factors influencing utilization of HIV prevention and treatment services among patients and providers in a heterogeneous setting: a qualitative study from South Africa. *PLoS Global Public Health*. 2022 Feb 3;2(2):e0000132. <https://doi.org/10.1371/journal.pgph.0000132>
37. Mavhu W, Dauya E, Bandason T, Munyati S, Cowan FM, Hart G, Corbett EL, Chikovore J. Chronic cough and its association with TB–HIV co-infection: factors affecting help-seeking behaviour in Harare, Zimbabwe. *Tropical Medicine & International Health*. 2010 May;15(5):574-9. <https://doi.org/10.1111/j.1365-3156.2010.02493.x>
38. Bailey LE, Siberry GK, Agaba P, Douglas M, Clinkscapes JR, Godfrey C. The impact of COVID-19 on multi-month dispensing (MMD) policies for antiretroviral therapy (ART) and MMD uptake in 21 PEPFAR-supported countries: a multi-country analysis. *Journal of the International AIDS Society*. 2021 Oct;24:e25794. <https://doi.org/10.1002/jia2.25794>
39. Moyo S, Hunt G, Zuma K, Zungu M, Marinda E, Mabaso M, Kana V, Kalimashe M, Ledwaba J, Naidoo I, Takatshana S. HIV drug resistance profile in South Africa: findings and implications from the 2017 national HIV household survey. *PLoS One*. 2020 Nov 4;15(11):e0241071. <https://doi.org/10.1371/journal.pone.0241071>

Figure 1: Study Sample Flow Diagram, SABBSM V survey, 2017

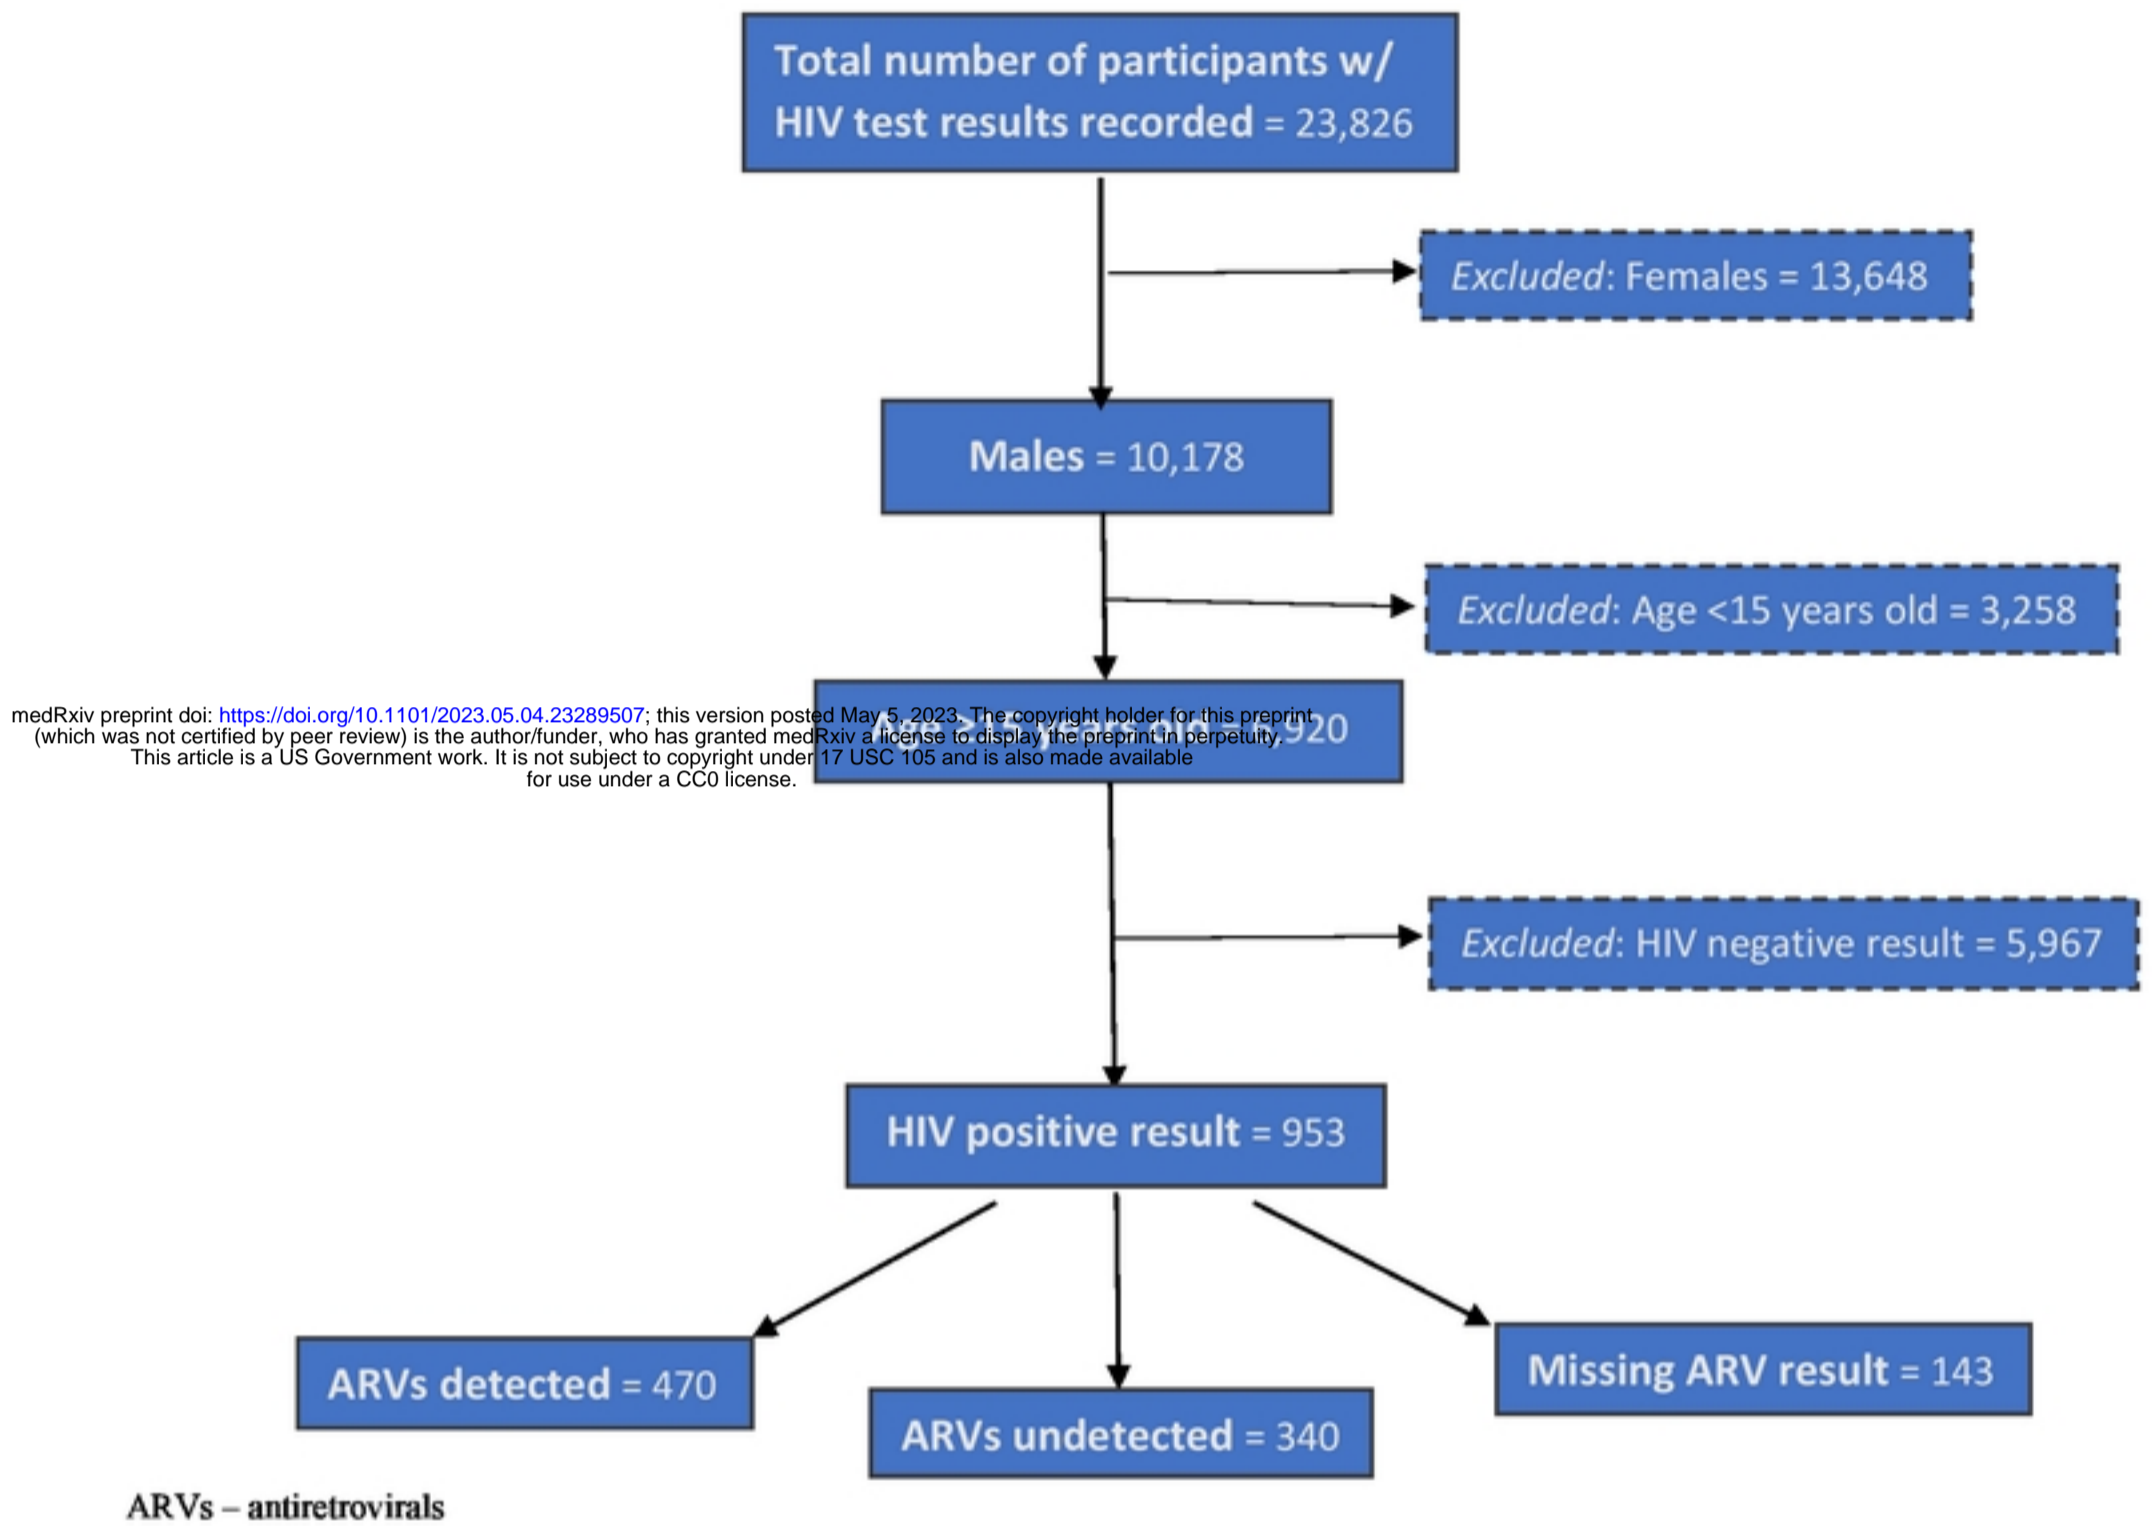

Figure 1
